# Supplementary material
Source: MDPI journal article supplement (https://www.mdpi.com/2079-9276/10/9/87)
Supplement: s1 [file s1]

# Assessing the application-specific substitutability of lithium-ion battery cathode chemistries based on material criticality, performance, and price

## *Supplementary Material*

Steffen Kiemel<sup>a,\*</sup>, Simon Glöser-Chahoud<sup>b</sup>, Lara Waltersmann<sup>a</sup>, Maximilian Schutzbach<sup>a</sup>, Alexander Sauer<sup>a</sup>, Robert Mieke<sup>a</sup>

<sup>a</sup>: *Fraunhofer Institute for Manufacturing Engineering and Automation IPA, Nobelstraße 12, Stuttgart, Germany*

<sup>b</sup>: *Karlsruhe Institute of Technology; Institute for industrial Production IIP, Hertzstraße 16, Karlsruhe, Germany*

\*Address correspondence to: [steffen.kiemel@ipa.fraunhofer.de](mailto:steffen.kiemel@ipa.fraunhofer.de)

|                                                     |   |
|-----------------------------------------------------|---|
| Additional information “criticality-category” ..... | 2 |
| Additional information “performance-category” ..... | 4 |
| Additional information “cost-category” .....        | 5 |
| Questionnaires and Participants .....               | 6 |
| References.....                                     | 8 |

Full article published in Journal Resources.

Manuscript available online: xy

### Additional information “criticality-category”

The denotations of most utilized indicators from the Social Hotspots Database changed throughout the years. Table 1 lists the indicators mentioned by Kolotzek et al. and compares them with the latest version and thus the indicators utilized in this article. Where sensible, specific indicators for the mining sector were selected. This applies to the indicators written in italic.

Table 2 lists the criticality scores for the three dimensions “supply risk”, environmental impact” and “social implications” for the seven assessed cathode chemistries. For the respective weightings and transformation rules of the individual utilized indicators, the reader is referred to the supplementary material of Kolotzek et al. [1]. Table 3 illustrates the values from Table 2 normalized on a scale from zero to the maximum value, whereas the latter equals one. The scores are color-coded on a scale from green (best value) to red (worst value).

| Original indicators utilized by Kolotzek et al. [1] (data from [2]) | Revised indicators utilized in this article (data from [2])                                |
|---------------------------------------------------------------------|--------------------------------------------------------------------------------------------|
| Risk of unemployment                                                | Average of Unemployment Percentage at the country level                                    |
| characterization of indigenous population                           | Percent of Population that is Indigenous                                                   |
| risk that country does not provide laws to protect indigenous       | Number of laws to protect indigenous according to ILO                                      |
| risk that indigenous people are negatively impacted                 | Overall risk of indigenous rights being infringed                                          |
| risk of child labor                                                 | <i>Risk of child labor by sector (qualitative)</i>                                         |
| risk of average wage being lower than non-poverty guideline         | <i>Risk that Sector Avg Wage is below Sweatfree Wage</i>                                   |
| risk of forced labor                                                | Overall Forced Labor in Country                                                            |
| risk of not to enforce collective bargaining rights                 | Collective bargaining coverage                                                             |
| risk of not to enforce freedom of association rights                | Overall risk of Freedom of Association                                                     |
| risk of not to enforce the right to strike                          | Freedom of Association Rights, Collective Bargaining Rights, Right to Strike - Qualitative |
| risk of fatal injuries                                              | <i>Fatal injuries by sector</i>                                                            |
| risk of non-fatal injuries                                          | <i>Non Fatal Work Related injuries by sector</i>                                           |
| risk of excessive working time                                      | Percent of Population working >X hrs per week, >6ND hrs per week                           |

**Table S1.** Social Indicators

|                             | NMC<br>111 | NMC<br>532 | NMC<br>622 | NMC<br>811 | NCA<br>3% Co | NCA<br>9% Co | LMO   | LFP   | LCO   |
|-----------------------------|------------|------------|------------|------------|--------------|--------------|-------|-------|-------|
| <b>Supply Risk</b>          | 53.56      | 51.18      | 50.66      | 48.48      | 46.95        | 48.75        | 51.13 | 47.67 | 62.84 |
| <b>Environmental Impact</b> | 21.14      | 24.40      | 26.32      | 28.28      | 34.02        | 33.78        | 22.34 | 12.47 | 14.47 |
| <b>Social Implications</b>  | 63.35      | 60.22      | 59.72      | 56.99      | 55.45        | 57.79        | 60.27 | 58.68 | 76.25 |

**Table S2.** Raw material criticality of LIB cathode chemistries

|                             | Criticality Normalized [0/max] |            |            |            |              |              |       |       |       |
|-----------------------------|--------------------------------|------------|------------|------------|--------------|--------------|-------|-------|-------|
|                             | NMC<br>111                     | NMC<br>532 | NMC<br>622 | NMC<br>811 | NCA<br>3% Co | NCA<br>9% Co | LMO   | LFP   | LCO   |
| <b>Supply Risk</b>          | 0.852                          | 0.814      | 0.806      | 0.771      | 0.747        | 0.776        | 0.814 | 0.759 | 1.000 |
| <b>Environmental Impact</b> | 0.622                          | 0.717      | 0.774      | 0.831      | 1.000        | 0.993        | 0.657 | 0.366 | 0.425 |
| <b>Social Implications</b>  | 0.831                          | 0.790      | 0.783      | 0.747      | 0.727        | 0.758        | 0.790 | 0.770 | 1.000 |

**Table S3.** Raw material criticality of LIB cathode chemistries, normalized on a scale from zero to the maximum value

### Additional information “performance-category”

For the application-specific performance assessment of LIB cathode chemistries, the main article refers to Full et al. and Zubi et al. Table 4 and Table 5 list the underlying data derived from the respective publications [3, 4]. Green highlighted values are adjusted based on the assumptions described in the main article. Table 6 lists the final performance score per cathode chemistry and field of application. The initially obtained values are normalized with the approach mentioned before. The same color-code is applied.

| Indicator  |                           | NMC | NMC111 | NMC532 | NMC622 | NMC811 | NCA | NCA 3% Co | NCA 9% Co | LMO | LFP | LCO |
|------------|---------------------------|-----|--------|--------|--------|--------|-----|-----------|-----------|-----|-----|-----|
| Maturity   | Degree of standardization | 2   | 2      | 2      | 1.75   | 1.75   | 2   | 1.75      | 2         | 1.5 | 1.5 | 2   |
| Durability | Lifespan                  | 2   | 2      | 2      | 1.5    | 1.5    | 1.5 | 1         | 1.5       | 1.5 | 2   | 1   |
| Safety     | Stability                 | 1.5 | 1.75   | 1.5    | 1.5    | 1.25   | 1.5 | 1         | 1.5       | 2   | 2   | 0.5 |
| Power      | Power density             | 2   | 2      | 2      | 2      | 2      | 1.5 | 1.5       | 1.5       | 2   | 2   | 1.5 |
| Energy     | Energy density            | 1.5 | 1      | 1.5    | 1.5    | 2      | 2   | 2         | 1.75      | 1   | 1   | 1.5 |

**Table S4.** Performance of cathode chemistries, based on [4]

|            |                           | Original scoring, based on [3] |                                   |                      |                      |                     |     | Transformed and normalized scoring |                                   |                      |                      |                     |
|------------|---------------------------|--------------------------------|-----------------------------------|----------------------|----------------------|---------------------|-----|------------------------------------|-----------------------------------|----------------------|----------------------|---------------------|
| Indicator  |                           | Traction batteries             |                                   |                      |                      |                     |     | Stationary energy storage systems  |                                   |                      |                      |                     |
|            |                           | Traction batteries             | Stationary energy storage systems | Consumer electronics | Power-/ garden tools | Domestic appliances |     | Traction batteries                 | Stationary energy storage systems | Consumer electronics | Power-/ garden tools | Domestic appliances |
| Maturity   | Degree of standardization | 1.5                            | 0.9                               | 0.9                  | 1.2                  | 1.1                 | --> | 0.183                              | 0.191                             | 0.143                | 0.169                | 0.186               |
| Durability | Lifespan                  | 1.9                            | 1.7                               | 1.3                  | 0.9                  | 1.1                 | --> | 0.232                              | 0.362                             | 0.206                | 0.127                | 0.186               |
| Safety     | Stability                 | 2                              | 1.6                               | 1.7                  | 1.8                  | 1.6                 | --> | 0.244                              | 0.340                             | 0.270                | 0.254                | 0.271               |
| Power      | Power density             | 1.1                            | 0.2                               | 0.8                  | 1.9                  | 1                   | --> | 0.134                              | 0.043                             | 0.127                | 0.268                | 0.169               |
| Energy     | Energy density            | 1.7                            | 0.3                               | 1.6                  | 1.3                  | 1.1                 | --> | 0.207                              | 0.064                             | 0.254                | 0.183                | 0.186               |

**Table S5.** Importance of technical criteria/indicator per field of application, based on [3]

|                                          | Performance [0/max] |            |            |            |              |              |      |      |      |
|------------------------------------------|---------------------|------------|------------|------------|--------------|--------------|------|------|------|
|                                          | NMC<br>111          | NMC<br>532 | NMC<br>622 | NMC<br>811 | NCA<br>3% Co | NCA<br>9% Co | LMO  | LFP  | LCO  |
| <b>Traction batteries</b>                | 0.35                | 0.29       | 0.50       | 0.45       | 0.77         | 0.46         | 0.54 | 0.39 | 1.00 |
| <b>Stationary energy storage systems</b> | 0.16                | 0.22       | 0.47       | 0.52       | 0.83         | 0.42         | 0.37 | 0.17 | 1.00 |
| <b>Consumer electronics</b>              | 0.40                | 0.33       | 0.50       | 0.43       | 0.72         | 0.46         | 0.53 | 0.41 | 1.00 |
| <b>Power-/ garden tools</b>              | 0.34                | 0.30       | 0.44       | 0.40       | 0.76         | 0.50         | 0.45 | 0.37 | 1.00 |
| <b>Domestic appliances</b>               | 0.33                | 0.30       | 0.48       | 0.45       | 0.76         | 0.47         | 0.48 | 0.36 | 1.00 |

**Table S6.** Weighted performance of cathode chemistries for selected fields of application, normalized on a scale from zero to the maximum value

### Additional information “cost-category”

The underlying information for the price category on a raw material level can be obtained from Table 7. The following Table 8 lists the aggregated results on the cathode-chemistry level. Table 9 transforms the obtained values to the introduced scaling from zero to the maximum value.

|                             |                                        | Li                             | Ni                  | Mn                 | Co                  | Al                 | Fe               | P               |
|-----------------------------|----------------------------------------|--------------------------------|---------------------|--------------------|---------------------|--------------------|------------------|-----------------|
| <b>Current Price (2019)</b> | Current Price [\$]                     | 10,169 <sup>1</sup>            | 13,903 <sup>2</sup> | 1,825 <sup>3</sup> | 32,796 <sup>4</sup> | 1,793 <sup>5</sup> | 400 <sup>6</sup> | 89 <sup>7</sup> |
|                             | Reference                              | [5]                            | [5]                 | [5]                | [5]                 | [5]                | [6]              | [5]             |
| <b>Average Price</b>        | Average Price [\$] long term 1990-2015 | 3,703                          | 12,748              | 958                | 36,642              | 1,852              | 52               | 46              |
|                             | Average Price [\$] mid term 2000-2015  | 3,311                          | 16,406              | 1,141              | 34,450              | 2,071              | 65               | 61              |
|                             | Reference                              | Own calculations, based on [7] |                     |                    |                     |                    |                  |                 |
| <b>Historic Volatility</b>  | Volatility long term 1990-2015         | 0.260                          | 0.303               | 0.264              | 0.332               | 0.170              | 0.140            | 0.233           |
|                             | Volatility mid term 2000-2015          | 0.330                          | 0.336               | 0.318              | 0.333               | 0.179              | 0.145            | 0.287           |
|                             | Reference                              | Own calculations, based on [7] |                     |                    |                     |                    |                  |                 |

**Table S7.** Price information – raw material level

#### Names of utilized datasets:

- <sup>1</sup> Lithium-carbonate, min. 99.5 % Li<sub>2</sub>CO<sub>3</sub>, battery grade, spot price, ex works, domestic China
- <sup>2</sup> LME, primary, min. 99,8 %, cash, in LME warehouse
- <sup>3</sup> Electrolytic (EMM), >= 99,7 %, export (fob), domestic
- <sup>4</sup> LME, min. 99,8 %, cash, in LME warehouse
- <sup>5</sup> LME, high grade primary, cash, in LME warehouse
- <sup>6</sup> Pig Iron FOB Southern Brazil
- <sup>7</sup> Phosphate rock, fob North Africa

|                                                  | NMC<br>111 | NMC<br>532 | NMC<br>622 | NMC<br>811 | NCA<br>3% Co | NCA<br>9% Co | LMO   | LFP  | LCO    | LFP<br>cathode |
|--------------------------------------------------|------------|------------|------------|------------|--------------|--------------|-------|------|--------|----------------|
| Current Price Commodity Perspective              | 15,544     | 13,650     | 14,731     | 14,121     | 14,058       | 15,914       | 2,325 | 604  | 30,295 | 6072           |
| Average Price 1990-2015 Commodity Perspective    | 15,409     | 12,910     | 13,965     | 12,882     | 12,601       | 14,925       | 1,123 | 195  | 33,002 | 5539           |
| Average Price 2000-2015 Commodity Perspective    | 15,860     | 14,162     | 15,528     | 15,280     | 15,485       | 17,271       | 1,271 | 192  | 31,009 | 6570           |
| Price Volatility 1990-2015 Commodity Perspective | 0.30       | 0.29       | 0.30       | 0.30       | 0.30         | 0.30         | 0.26  | 0.20 | 0.32   | 0.20           |
| Price Volatility 2000-2015 Commodity Perspective | 0.33       | 0.33       | 0.33       | 0.33       | 0.33         | 0.33         | 0.32  | 0.24 | 0.33   | 0.24           |

**Table S8.** Price information – cathode chemistry level

|                                                  | Price Normiert [0/max] |            |            |            |              |              |       |       |       |                |
|--------------------------------------------------|------------------------|------------|------------|------------|--------------|--------------|-------|-------|-------|----------------|
|                                                  | NMC<br>111             | NMC<br>532 | NMC<br>622 | NMC<br>811 | NCA<br>3% Co | NCA<br>9% Co | LMO   | LFP   | LCO   | LFP<br>cathode |
| Current Price Commodity Perspective              | 0.513                  | 0.451      | 0.486      | 0.466      | 0.464        | 0.525        | 0.077 | 0.020 | 1.000 | 0.200          |
| Average Price 1990-2015 Commodity Perspective    | 0.467                  | 0.391      | 0.423      | 0.390      | 0.382        | 0.452        | 0.034 | 0.006 | 1.000 | 0.168          |
| Average Price 2000-2015 Commodity Perspective    | 0.511                  | 0.457      | 0.501      | 0.493      | 0.499        | 0.557        | 0.041 | 0.006 | 1.000 | 0.212          |
| Price Volatility 1990-2015 Commodity Perspective | 0.912                  | 0.905      | 0.915      | 0.918      | 0.914        | 0.925        | 0.815 | 0.618 | 1.000 | 0.618          |
| Price Volatility 2000-2015 Commodity Perspective | 0.987                  | 0.989      | 0.994      | 1.000      | 0.994        | 0.995        | 0.956 | 0.712 | 0.997 | 0.712          |

**Table S9.** Price of cathode chemistries, normalized on a scale from zero to the maximum value

## Questionnaires and Participants

For identifying the weightings of indicators from the categories “criticality of substitute” and “price of substitute” as well as the categories from the level “substitutability” a questionnaire was conducted (compare main article for further information). Fig\_\_\_ visualizes the utilized questionnaire for the pairwise comparisons. The survey was conducted in German. \_\_\_ lists the consulted experts as well as their respective affiliation.

Supplementary Material for 'Assessing the application-specific substitutability of lithium-ion battery cathode chemistries based on material criticality, performance, and price'

**Erläuterung**

Die beschriebenen Kategorien und Indikatoren sollen mit Hilfe der Methodik der paarweisen Vergleiche hinsichtlich ihrer Relevanz für die übergeordnete Ebene/Kategorie gewichtet werden. Bitte nutzen Sie die Schieberegler um Ihre Gewichtung einzutragen. Die Skala entspricht dabei der eines klassischen AHP-Prozesses und ist in nachfolgender Tabelle dargestellt. Dabei müssen Sie ausschließlich die linke Seite der Tabelle ("Wichtiger/Gleich") berücksichtigen, da jeweils die Frage "Welche Kategorie/Indikator ist wichtiger?" gestellt wird. Die Bedeutung Ihrer am Schieberegler eingestellten Bewertung ist als Fließtext unterhalb des Schiebereglers abzulesen. Sollten Sie Anmerkungen haben, nutzen Sie bitte das Kommentarfeld am rechten Rand des Fragebogens.

Bitte speichern Sie den ausgefüllten Fragebogen ab und schicken Sie ihn an [steffen.kiemel@ipa.fraunhofer.de](mailto:steffen.kiemel@ipa.fraunhofer.de)

Herzlichen Dank!

| Kategorien/Indikatoren "a" vs. "b" |                     |                    |                       |
|------------------------------------|---------------------|--------------------|-----------------------|
| Wichtiger/Gleich                   |                     | Unwichtiger        |                       |
| 1                                  | gleich wichtig      |                    |                       |
| 3                                  | etwas wichtiger     | 1/3                | etwas unwichtiger     |
| 5                                  | deutlich wichtiger  | 1/5                | deutlich unwichtiger  |
| 7                                  | viel wichtiger      | 1/7                | viel unwichtiger      |
| 9                                  | absolut dominierend | 1/9                | absolut untergeordnet |
| 2,4,6,8                            | Zwischenwerte       | 1/2, 1/4, 1/6, 1/8 | Zwischenwerte         |

**Frage:** Wie sind die Kategorien der Ebene "Substituierbarkeit" gegeneinander zu gewichten? (vgl. Abbildung 2 - PDF Dokument)

Folgende Kategorien sollen gewichtet werden:

Performance des Substituts

Kritikalität des Substituts

Preis des Substituts

9 6 3 1 3 6 9

Grübelkoeffizient 1.00

Welche Kategorie ist wichtiger?

Grübelkoeffizient 1.00

Faktor Performance des Substituts ist gleich wichtig wie Faktor Kritikalität des Substituts

Grübelkoeffizient 1.00

Welche Kategorie ist wichtiger?

Grübelkoeffizient 1.00

Faktor Performance des Substituts ist gleich wichtig wie Faktor Preis des Substituts

Grübelkoeffizient 1.00

Welche Kategorie ist wichtiger?

Grübelkoeffizient 1.00

Faktor Kritikalität des Substituts ist gleich wichtig wie Faktor Preis des Substituts

**Frage:** Wie sind die Indikatoren der Kategorie "Kritikalität des Substituts" gegeneinander zu gewichten? (vgl. Abbildung 2 - PDF Dokument)

Folgende Indikatoren sollen gewichtet werden:

Versorgungsrisiko des Substituts

Ökologisches Risiko des Substituts

Soziales Risiko des Substituts

9 6 3 1 3 6 9

Grübelkoeffizient 1.00

Vas ist wichtiger?

Grübelkoeffizient 1.00

Faktor Versorgungsrisiko des Substituts ist gleich wichtig wie Faktor Ökologischer Risiko des Substituts

Grübelkoeffizient 1.00

Vas ist wichtiger?

Grübelkoeffizient 1.00

Faktor Versorgungsrisiko des Substituts ist gleich wichtig wie Faktor Sozialer Risiko des Substituts

Grübelkoeffizient 1.00

Vas ist wichtiger?

Grübelkoeffizient 1.00

Faktor Ökologischer Risiko des Substituts ist gleich wichtig wie Faktor Sozialer Risiko des Substituts

**Frage:** Wie sind die Indikatoren der Kategorie "Preis des Substituts" gegeneinander zu gewichten? (vgl. Abbildung 2 - PDF Dokument)

Folgende Indikatoren sollen gewichtet werden:

Derzeitiger Rohstoffpreis

Ø Rohstoffpreis langfristig

Ø Rohstoffpreis mittelfristig

Volatilität Rohstoffpreis langfristig

Volatilität Rohstoffpreis mittelfristig

9 6 3 1 3 6 9

Grübelkoeffizient 1.00

Vas ist wichtiger?

Grübelkoeffizient 1.00

Faktor Derzeitiger Rohstoffpreis ist gleich wichtig wie Faktor Ø Rohstoffpreis langfristig

Grübelkoeffizient 1.00

Vas ist wichtiger?

Grübelkoeffizient 1.00

Faktor Derzeitiger Rohstoffpreis ist gleich wichtig wie Faktor Ø Rohstoffpreis mittelfristig

Grübelkoeffizient 1.00

Vas ist wichtiger?

Grübelkoeffizient 1.00

Faktor Derzeitiger Rohstoffpreis ist gleich wichtig wie Faktor Volatilität Rohstoffpreis langfristig

Grübelkoeffizient 1.00

Vas ist wichtiger?

Grübelkoeffizient 1.00

Faktor Derzeitiger Rohstoffpreis ist gleich wichtig wie Faktor Volatilität Rohstoffpreis mittelfristig

Grübelkoeffizient 1.00

Vas ist wichtiger?

Grübelkoeffizient 1.00

Faktor Ø Rohstoffpreis langfristig ist gleich wichtig wie Faktor Ø Rohstoffpreis mittelfristig

Grübelkoeffizient 1.00

Vas ist wichtiger?

Grübelkoeffizient 1.00

Faktor Ø Rohstoffpreis langfristig ist gleich wichtig wie Faktor Volatilität Rohstoffpreis langfristig

Grübelkoeffizient 1.00

Vas ist wichtiger?

Grübelkoeffizient 1.00

Faktor Ø Rohstoffpreis langfristig ist gleich wichtig wie Faktor Volatilität Rohstoffpreis mittelfristig

Grübelkoeffizient 1.00

Vas ist wichtiger?

Grübelkoeffizient 1.00

Faktor Ø Rohstoffpreis mittelfristig ist gleich wichtig wie Faktor Volatilität Rohstoffpreis langfristig

Grübelkoeffizient 1.00

Vas ist wichtiger?

Grübelkoeffizient 1.00

Faktor Ø Rohstoffpreis mittelfristig ist gleich wichtig wie Faktor Volatilität Rohstoffpreis mittelfristig

Grübelkoeffizient 1.00

Vas ist wichtiger?

Grübelkoeffizient 1.00

Faktor Volatilität Rohstoffpreis langfristig ist gleich wichtig wie Faktor Volatilität Rohstoffpreis mittelfristig

Figure S1. Questionnaire for the AHP-process

| Titel     | Name                 | Institution                                 |
|-----------|----------------------|---------------------------------------------|
| Dr. -Ing. | Lara Waltersmann     | Fraunhofer IPA                              |
|           | Johannes Full        | Fraunhofer IPA                              |
|           | Robert Miehe         | Fraunhofer IPA                              |
|           | Steffen Kiemel       | Fraunhofer IPA                              |
|           | Sonja Rosenberg      | Karlsruher Institut für Technologie         |
|           | Sandra Huster        | Karlsruher Institut für Technologie         |
| Dr. -Ing. | Simon Glöser-Chahoud | Karlsruher Institut für Technologie         |
| Dr. -Ing. | Gernot Kraberger     | Samsung SDI                                 |
| Dr. -Ing. | Klaus Steinmüller    | THINKTANK Industrielle Ressourcenstrategien |
| Dr. -Ing. | Christoph Helbig     | Universität Augsburg                        |
|           | Lars Wietschel       | Universität Augsburg                        |
| Dr. -Ing. | David Ensling        | Varta Microbattery GmbH                     |

**Table S10.** Consulted experts for the AHP-process

## References

- [1] Kolotzek, C., Helbig, C., Thorenz, A., Reller, A., and Tuma, A. 2018. A company-oriented model for the assessment of raw material supply risks, environmental impact and social implications. *Journal of Cleaner Production* 176, 566–580.  
DOI=10.1016/j.jclepro.2017.12.162.
- [2] New Earth / Social Hotspots Database project. 2021. *Social Hotspots Database*. <http://www.socialhotspot.org/>.
- [3] Full, J., Wanner, J., Kiemel, S., Miehe, R., Weeber, M., and Sauer, A. 2020. Comparing Technical Criteria of Various Lithium-Ion Battery Cell Formats for Deriving Respective Market Potentials. In *2020 IEEE Electric Power and Energy Conference (EPEC)*. IEEE, 1–6. DOI=10.1109/EPEC48502.2020.9320122.



- [4] Zubi, G., Dufo-López, R., Carvalho, M., and Pasaoglu, G. 2018. The lithium-ion battery: State of the art and future perspectives. *Renewable and Sustainable Energy Reviews* 89, 292–308. DOI=10.1016/j.rser.2018.03.002.
- [5] DERA and BGR. 2019. *Preismonitor. Dezember 2019*. Deutsche Rohstoffagentur; Bundesanstalt für Geowissenschaften und Rohstoffe. [https://www.deutsche-rohstoffagentur.de/DE/Themen/Min\\_rohstoffe/Produkte/Preisliste/pm\\_19\\_12.pdf?\\_\\_blob=publicationFile&v=5](https://www.deutsche-rohstoffagentur.de/DE/Themen/Min_rohstoffe/Produkte/Preisliste/pm_19_12.pdf?__blob=publicationFile&v=5).
- [6] Shulga, M. 2018. *US Pig Iron: Prices go down on weakening scrap market*. <https://www.metalbulletin.com/Article/3825289/US-PIG-IRON-Prices-go-down-on-weakening-scrap-market.html>.
- [7] Kelly, T. D., Matos, G. R., Buckingham, D. A., DiFrancesco, C. A., and Porter, K. E. 2017/2018. *Historical Statistics for Mineral and Material Commodities in the United States*. <https://www.usgs.gov/centers/nmic/historical-statistics-mineral-and-material-commodities-united-states>.
